# Supplementary material
Source: Springer Nature journal article supplement (https://www.springermedizin.de/resource/supplementary/12993_2013_469_MOESM4_ESM.pdf/9617844)

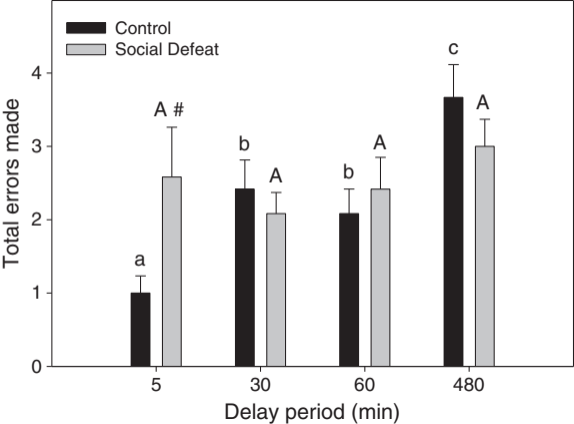

Supplement: MOESM4 [file 9617844]
